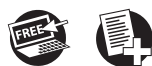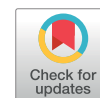

# Trends in Diabetes-Related Preventable Hospitalizations in the U.S., 2005–2014

*Diabetes Care* 2018;41:e72–e73 | <https://doi.org/10.2337/dc17-1942>

Muni Rubens,<sup>1</sup> Anshul Saxena,<sup>2</sup>  
Venkataraghavan Ramamoorthy,<sup>3</sup>  
Rohan Khera,<sup>4</sup> Jonathan Hong,<sup>5</sup>  
Emir Veledar,<sup>2</sup> and  
Khurram Nasir<sup>2,6,7,8,9</sup>

Diabetes-related preventable hospitalizations are indicators of effective primary care services (1), but recent trends are unknown. Hence, we examined the trends in diabetes-related preventable hospitalizations to critically inform policy decisions seeking accountability.

The current study used National (Nationwide) Inpatient Sample (NIS) data for assessing the trends in diabetes-related preventable hospitalization rates during the years 2005–2014. The NIS collected stratified samples of ~20% of U.S. community hospital discharge data, which has been useful in calculating national estimates (2). The main outcomes included temporal trends in diabetes-related preventable hospitalization rates and associated conditions such as diabetes short-term complications, diabetes long-term complications, uncontrolled diabetes, lower-extremity amputations, and hospitalization costs. Yearly rates were calculated by dividing diabetes-related preventable hospitalizations and four diabetes-related Prevention Quality Indicators conditions by estimated number of adults aged ≥18 years with diagnosed

diabetes obtained from National Health Interview Survey (NHIS) data.

A total of 5,399,199 diabetes-related preventable hospitalizations were reported as primary discharge diagnosis during the years 2005–2014. Diabetes-related preventable hospitalizations increased from 500,444 in 2005 to 577,040 in 2014. Age-adjusted diabetes-related preventable hospitalization rates did not change significantly during the study period ( $P_{\text{trend}} = 0.279$ ) (Fig. 1A). Diabetes-related preventable hospitalization rates decreased across all age-groups, except for an increase in the age-group 18–44 years, which was not significant (relative increase 20.5%;  $P_{\text{trend}} = 0.052$ ). The overall diabetes-related preventable hospitalization rates showed an annual percentage change of 1.0% (95% CI –0.9, 2.9;  $P = 0.300$ ).

Age-adjusted hospitalization rates due to diabetes short-term complications increased significantly (relative increase 30.3%;  $P_{\text{trend}} = 0.003$ ) while those due to uncontrolled diabetes decreased significantly (relative increase 68.4%;  $P_{\text{trend}} < 0.001$ ) (Fig. 1B). Hospitalization rates due to

diabetes short-term complications increased across all age-groups, except for a nonsignificant decrease in the age-group ≥75 years (relative decrease 10.00%;  $P_{\text{trend}} = 0.838$ ). Hospitalization rates due to uncontrolled diabetes significantly decreased in all age-groups.

The mean length of stay decreased significantly from 5.7 to 5.3 days during the years 2005–2014 (relative decrease 7.5%;  $P_{\text{trend}} < 0.001$ ). The total cost of hospitalizations due to diabetes-related preventable causes significantly increased from \$5.32 to \$6.28 billion during the study period ( $P_{\text{trend}} = 0.042$ ); however, mean hospitalization cost decreased significantly from \$12,080 to \$11,440 ( $P_{\text{trend}} = 0.017$ ).

Our study found that diabetes-related preventable hospitalization rates did not change significantly during the years 2005–2014, unlike the results in a previous study (3) that reported significantly decreasing trends. This could probably be due to a slight increase in hospitalization rates due to diabetes short-term complications balanced by a slight decrease in hospitalization rates due to

<sup>1</sup>Miami Cancer Institute, Baptist Health South Florida, Miami, FL

<sup>2</sup>Center for Healthcare Advancement and Outcomes, Baptist Health South Florida, Miami, FL

<sup>3</sup>Department of Nutrition and Kinesiology, University of Central Missouri, Warrensburg, MO

<sup>4</sup>Division of Cardiology, University of Texas Southwestern Medical Center, Dallas, TX

<sup>5</sup>Division of Cardiovascular Surgery, Vancouver General Hospital, Vancouver, British Columbia, Canada

<sup>6</sup>Herbert Wertheim College of Medicine, Florida International University, Miami, FL

<sup>7</sup>Miami Cardiac & Vascular Institute, Baptist Health South Florida, Miami, FL

<sup>8</sup>Department of Epidemiology, Robert Stempel College of Public Health & Social Work, Florida International University, Miami, FL

<sup>9</sup>Ciccarone Center for the Prevention of Heart Disease, The Johns Hopkins University, Baltimore, MD

Corresponding author: Khurram Nasir, [khurramn@baptisthealth.net](mailto:khurramn@baptisthealth.net).

Received 17 September 2017 and accepted 31 December 2017.

M.R. and A.S. are co-first authors.

© 2018 by the American Diabetes Association. Readers may use this article as long as the work is properly cited, the use is educational and not for profit, and the work is not altered. More information is available at <http://www.diabetesjournals.org/content/license>.

See accompanying articles, pp. 917, 929, 933, 940, 949, 956, 963, 971, 979, and 985.

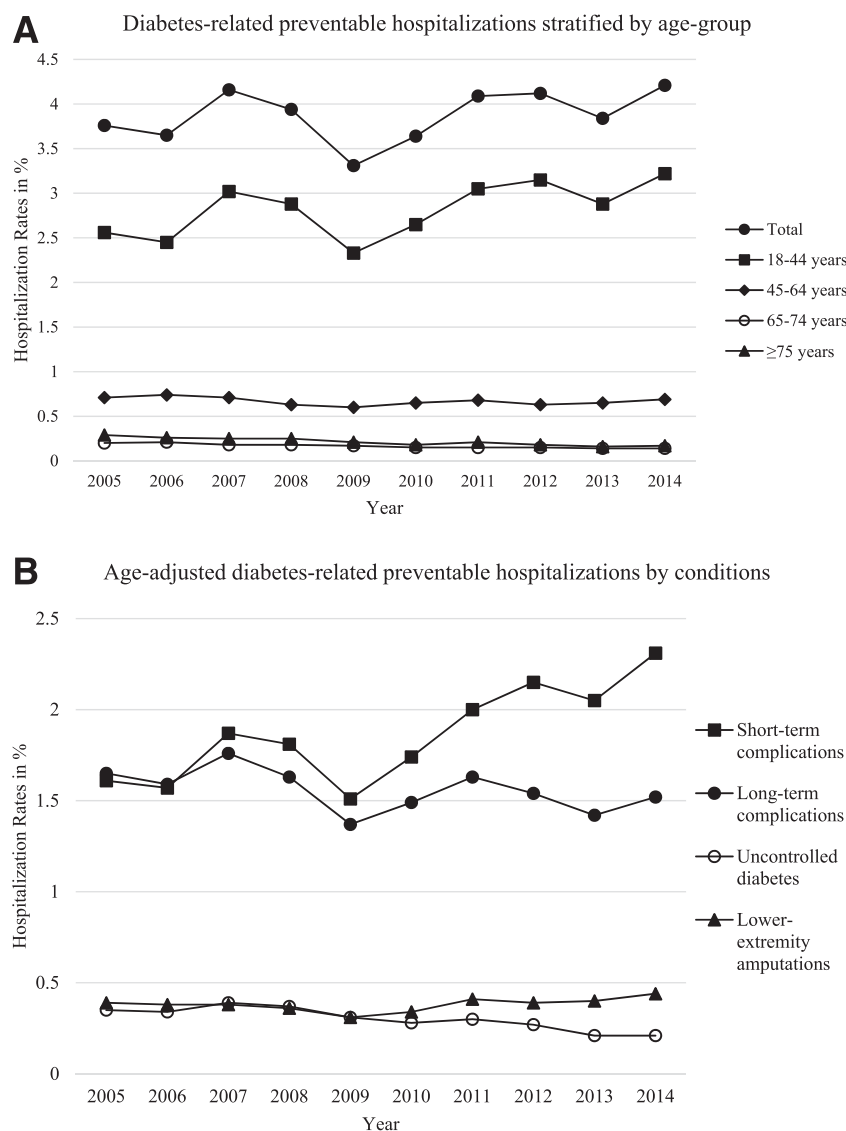

**Figure 1**—Diabetes-related preventable hospitalization rates, 2005–2014.

uncontrolled diabetes. More importantly, we noted a significant increase in diabetes-related preventable hospitalizations due to acute complications in the age-group 18–44 years. Future interventions should

focus on adequate management strategies in younger patients (18–44 years) because earlier control over the risk factors for microvascular and macrovascular processes could delay complications (4,5) and

significantly decrease the prevalence of hospitalizations in this age-group. Further studies are needed to identify the underlying determinants of these trends so that primary care can focus on effective strategies to address these continuing challenges.

**Acknowledgments.** The authors thank the millions of patients who contributed to the NIS database and the numerous professionals who created the database.

**Duality of Interest.** No potential conflicts of interest relevant to this article were reported.

**Author Contributions.** M.R. conceived the idea, and M.R., A.S., and V.R. wrote and edited the manuscript. R.K., J.H., and K.N. reviewed and edited the manuscript and contributed to the intellectual content. E.V. reviewed statistical analyses and edited the manuscript. M.R. and A.S. are the guarantors of this work and, as such, had full access to all the data in the study and take responsibility for the integrity of the data and the accuracy of the data analysis.

## References

1. Agency for Healthcare Research and Quality. *AHRQ Quality Indicators—Guide to Prevention Quality Indicators: Hospital Admission for Ambulatory Care Sensitive Conditions*. Rockville, MD, 2001
2. Healthcare Cost and Utilization Project (HCUP). Overview of the National (Nationwide) Inpatient Sample (NIS) [article online], 2017. Available from <https://www.hcup-us.ahrq.gov/nisoverview.jsp>. Accessed 28 August 2017
3. Wang J, Imai K, Engelgau MM, Geiss LS, Wen C, Zhang P. Secular trends in diabetes-related preventable hospitalizations in the United States, 1998–2006. *Diabetes Care* 2009;32:1213–1217
4. Holman RR, Paul SK, Bethel MA, Matthews DR, Neil HAW. 10-year follow-up of intensive glucose control in type 2 diabetes. *N Engl J Med* 2008;359:1577–1589
5. Nathan DM, Cleary PA, Backlund JY, et al.; Diabetes Control and Complications Trial/Epidemiology of Diabetes Interventions and Complications (DCCT/EDIC) Study Research Group. Intensive diabetes treatment and cardiovascular disease in patients with type 1 diabetes. *N Engl J Med* 2005;353:2643–2653
